# Identification and Evolution of Drug Efflux Pump in Clinical *Enterobacter aerogenes* Strains Isolated in 1995 and 2003

Jacqueline Chevalier<sup>1,3</sup>, Céline Mulfinger<sup>1,3</sup>, Eric Garnotel<sup>1,2</sup>, Pierre Nicolas<sup>1,3</sup>, Anne Davin-Régli<sup>1</sup>, Jean-Marie Pagès<sup>1\*</sup>

**1** UMR-MD1, IFR 48, Facultés de Médecine et de Pharmacie, Marseille, France, **2** Service de Biologie, H.I.A. Laveran, Marseille, France, **3** IMTSSA, Marseille, France

## Abstract

**Background:** The high mortality impact of infectious diseases will increase due to accelerated evolution of antibiotic resistance in important human pathogens. Development of antibiotic resistance is a evolutionary process inducing the erosion of the effectiveness of our arsenal of antibiotics. Resistance is not necessarily limited to a single class of antibacterial agents but may affect many unrelated compounds; this is termed 'multidrug resistance' (MDR). The major mechanism of MDR is the active expulsion of drugs by bacterial pumps; the treatment of Gram negative bacterial infections is compromised due to resistance mechanisms including the expression of efflux pumps that actively expel various usual antibiotics ( $\beta$ -lactams, quinolones, ...).

**Methodology/Principal Findings:** *Enterobacter aerogenes* has emerged among *Enterobacteriaceae* associated hospital infections during the last twenty years due to its faculty of adaptation to antibiotic stresses. Clinical isolates of *E. aerogenes* belonging to two strain collections isolated in 1995 and 2003 respectively, were screened to assess the involvement of efflux pumps in antibiotic resistance. Drug susceptibility assays were performed on all bacterial isolates and an efflux pump inhibitor (PA $\beta$ N) previously characterized allowed to decipher the role of efflux in the resistance. Accumulation of labelled chloramphenicol was monitored in the presence of an energy poison to determine the involvement of active efflux on the antibiotic intracellular concentrations. The presence of the PA $\beta$ N-susceptible efflux system was also identified in resistant *E. aerogenes* strains.

**Conclusions/Significance:** For the first time a noticeable increase in clinical isolates containing an efflux mechanism susceptible to pump inhibitor is report within an 8 year period. After the emergence of extended spectrum  $\beta$ -lactamases in *E. aerogenes* and the recent characterisation of porin mutations in clinical isolates, this study describing an increase in inhibitor-susceptible efflux throws light on a new step in the evolution of mechanism in *E. aerogenes*.

**Citation:** Chevalier J, Mulfinger C, Garnotel E, Nicolas P, Davin-Régli A, et al. (2008) Identification and Evolution of Drug Efflux Pump in Clinical *Enterobacter aerogenes* Strains Isolated in 1995 and 2003. PLoS ONE 3(9): e3203. doi:10.1371/journal.pone.0003203

**Editor:** Floyd Romesberg, The Scripps Research Institute, United States of America

**Received:** January 15, 2008; **Accepted:** July 23, 2008; **Published:** September 12, 2008

**Copyright:** © 2008 Chevalier et al. This is an open-access article distributed under the terms of the Creative Commons Attribution License, which permits unrestricted use, distribution, and reproduction in any medium, provided the original author and source are credited.

**Funding:** This study was supported by the Service de Santé des Armées (contrat recherche clinique n° 2004RC16 and livre rouge operation 23e), by the Université de la Méditerranée and from Eloi Colley prize: Académie Nationale de Médecine (J.-M. Pagès).

**Competing Interests:** The authors have declared that no competing interests exist.

\* E-mail: Jean-Marie.PAGES@univmed.fr

These authors contributed equally to this work.

## Introduction

Among *Enterobacteriaceae* associated hospital infections, *Enterobacter aerogenes* has emerged during the last twenty years due to its efficient adaptative response to environmental stresses [1]. This common hospital pathogen in Europe is involved in nosocomial respiratory tract and urinary infectious diseases [2–8]. This behaviour has been associated with a decreased susceptibility to the most recently developed cephalosporins, including cefepime and ceftazidime (last cephalosporin generation), and to carbapenems [4,9–11]. An increasing number of clinical *E. aerogenes* strains exhibits a plasmid encoding extended-spectrum  $\beta$ -lactamase associated with an aminoglycoside enzymatic resistance in addition to a chromosomal cephalosporinase and the clinical isolates present also an acquired resistance, *via* target mutation, to other antibiotic classes such as quinolones [2,4–15]. The

regulation of envelope permeability including the synthesis of porins, the modification of lipopolysaccharide and the expression of efflux pumps has been reported by several studies: (i) a strong correlation has been reported between the absence of the *E. aerogenes* major porin, *Omp36*, and imipenem resistance, (ii) some isolates showing a resistance towards polymyxin group had a simultaneous alteration of the lipopolysaccharide structure and, (iii) in multi-drug resistant (MDR) strains the expression of an efflux pump has been demonstrated to contribute to a severe decrease in intracellular concentrations of various antibiotic classes [3,4,10,12,13,16]. It has been demonstrated that during 5 days of imipenem treatment, clinical isolates had developed imipenem resistance *via* a decrease of porin synthesis conjointly to a production of efflux system [4,17]. This tremendous capacity to rapidly develop antibiotic resistance has been associated to the regulation cascade involving the *mar* regulon and *ramA* regulator

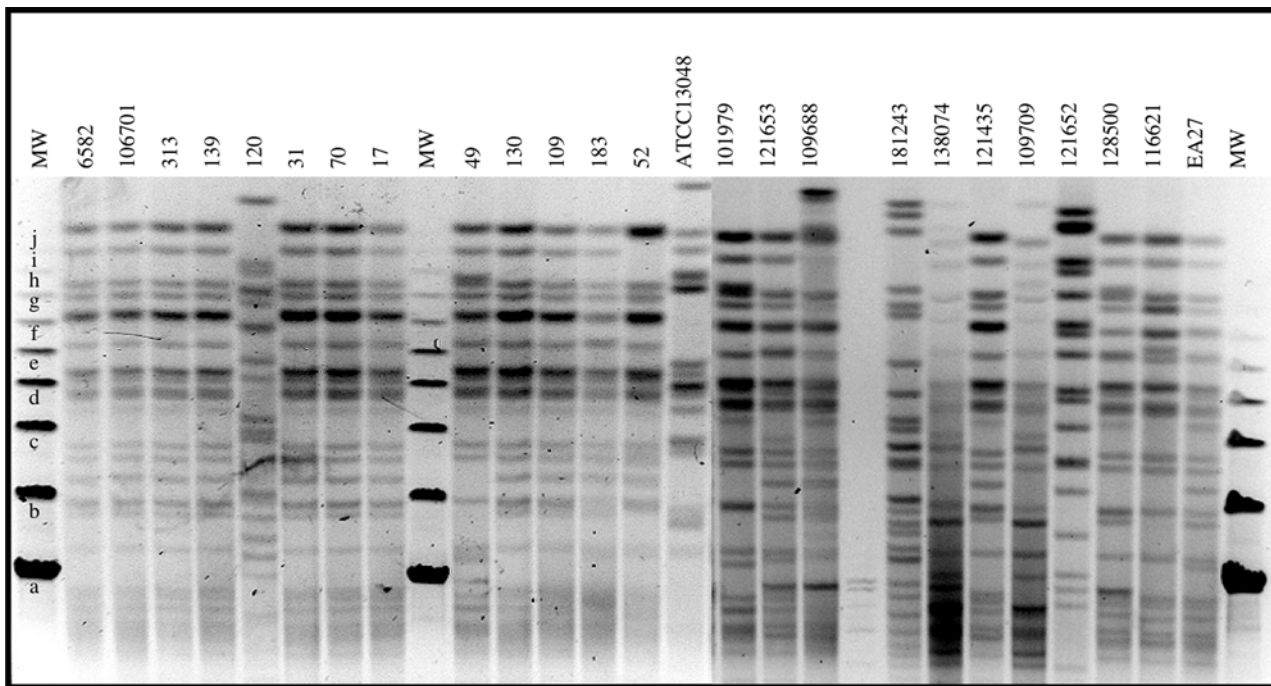

**Figure 1. PFGE of *Xba*I-digested genomic DNA preparations from various clinical *Enterobacter aerogenes* isolates.** 1995 isolates: 6582, 106701, 313, 139, 120, 31, 70, 17, 49, 130, 109, 183, 52. 2003 isolates: 101979, 121653, 109688, 181243, 138074, 121435, 109709, 121652, 128500, 116621. ATCC13048 and EA27, used as reference strains. Molecular weight markers are indicated: a, 48.5 kb; b, 97 kb; c, 145.5 kb; d, 194 kb; e, 242.5 kb; f, 291 kb; g, 340 kb; h, 388 kb; i, 437 kb; j, 485 kb; h, 534 kb. doi:10.1371/journal.pone.0003203.g001

gene which control the expression of membrane transporters [1]. Bacterial efflux pumps represent an active protection mechanism against toxic compounds and the major efflux pump, AcrAB-TolC, identified in *E. aerogenes* clinical isolates expels a variety of compounds including detergents and structurally unrelated antimicrobial agents such as quinolones, tetracyclines and chloramphenicol [18–21]. The activity of efflux pump in various resistant clinical isolates has been characterized by using different efflux pump inhibitors that compete with the antibiotic efflux or with an energy poison that collapses the membrane potential required for the active antibiotic transport [22–24].

The poly-specificity of efflux transporters confers a general resistance phenotype that can drive the acquisition of additional mechanisms of antibiotic resistance such as target mutation or secretion of enzymes that degrade antibiotics and also reinforce the effect of these acquired mechanisms [20]. It has been recently demonstrated that the expression of the AcrAB-TolC pump is an important prerequisite for the selection of fluoroquinolone resistant mutants that exhibit mutated targets (DNA gyrase) in various Gram-negative bacteria such as *Salmonella* or *Camfylobacter*, two major food-borne pathogens involved in severe human diseases [25,26]. Consequently, the spread of this resistance mechanism and the modulation of the different bacterial responses to antibiotic therapy calls for the identification of efflux pump activity and their prevalence in clinical strains. An important question addresses the evolution of drug resistance and the dissemination of this efflux mechanism in Gram-negative bacterial pathogens.

To this aim, we decided to analyse two *E. aerogenes* populations isolated from Marseille hospitals in 1995 and 2003. The local criteria used in 1995 [10], were re-used in 2003 in order to prevent (i) introduction of some bias caused by different procedures used by other institutions and (ii) ecological variance due to a plethora of variable associated with different geographic areas. These isolates

were selected according to their noticeable cross-resistance pattern to cephalosporins as previously reported [10]. In addition, the epidemiology of the *E. aerogenes* strains are checked in the two collections. We thus compare the two collections for resistance to structurally unrelated antibiotics to assess the frequency of strains exhibiting a MDR phenotype that may reflect the production of an efflux mechanism and to evaluate the number of strains expressing a documented efflux pump during this 1995–2003 interval.

## Results

### Strain characterization and antibiotic susceptibility of *E. aerogenes* isolates

The DNA restriction pattern of isolates collected during the years 1995 and 2003 were performed and analysed by pulsed field gel electrophoresis (PFGE) to determine their relatedness. These DNA restriction patterns were compared according to criteria proposed by Tenover *et al.* [27]. Figure 1 illustrates a representative set of this molecular epidemiological typing. Isolates whose patterns were indistinguishable or differing by no more than 3 fragments were considered to belong to the same epidemic clone. An isolate was considered to be possibly related to the outbreak strain if their patterns did not differ in more than 4–6 bands. The patterns were unrelated if they showed more than 7 band differences. Forty-eight strains were studied and 46 generated reproducible fingerprint patterns. Among them the pattern of 21 strains was identical, 14 showed 1 to 5 band differences and 11 had a pattern with more than 6 band differences. Among these eleven strains, 3 isolates were closely related. 35 isolates were considered to belong to the same epidemiological prevalent clone previously reported [4,5,9,28] and 11 strains were consistent to be of different origin.

The antibiotic susceptibilities of strains collected during the periods 1995 and 2003 were presented in Table 1–2. A large

number of the isolates exhibited a noticeable resistance phenotype, e.g. 61% and 74 to 83% of strains were resistant to chloramphenicol and tested quinolones, respectively (Table 3). Conversely, only 2% and 9% of strains were resistant to imipenem and cefepime respectively. About 12% of tested strains harboured a susceptible phenotype against the used antibiotics (imipenem, cefepime, tetracycline, chloramphenicol, nalidixic acid, norfloxacin, ofloxacin, sparfloracin). Although chloramphenicol is now rarely used in human therapy, a major proportion of the screened isolates exhibited chloramphenicol resistance. In addition, these strains also presented a high level resistance against other assayed antibiotics.

**PABN-susceptible efflux pump in *E. aerogenes***

We have previously demonstrated that the efflux pump inhibitor phenylalanine-arginine β-naphthylamide (PABN) is able to block the efflux involved in chloramphenicol resistance in *E. aerogenes* clinical strains [13,24]. In order to evaluate the activity of this efflux mechanism in the two collections of *E. aerogenes* isolates, the effect of PABN was assayed on the level of chloramphenicol susceptibility. For a number of isolates, addition of PABN caused an increase in chloramphenicol susceptibility by at least three dilution factors (e.g. reduction of the MIC from 8 to 1 µg/ml) indicating the involvement of a PABN-susceptible efflux in the resistance. In presence of PABN, the MIC for chloramphenicol was noticeably decreased in about 40% of all non-susceptible (intermediate+resistant strains, I+R) isolates tested (Table 4). This result reflects the prevalence of a functional efflux mechanism that is susceptible to the inhibitor in the collected strains.

It is important to note that among the total of I+R strains exhibiting a PABN-susceptible efflux mechanism, the majority were isolated in 2003: the EPI-reversed strains were observed in a significantly greater number of chloramphenicol resistant strains (Table 4) selected in 2003 (20/29) than those selected in 1995 (9/29). These results indicate a noticeable increase in number of PABN-susceptible efflux pumps acting in the strains isolated in 2003.

**Evidence of active efflux for chloramphenicol in multiresistant *E. aerogenes***

The activity of efflux pump in resistant isolates harbouring a PABN-susceptible efflux was evaluated by measuring the intracellular accumulation of radiolabelled chloramphenicol in the reference strain and selected clinical isolates. Carbonyl cyanide *m*-chlorophenylhydrazone (CCCP), was a well-described tool allowing to characterize an energy-dependent efflux in resistant Gram-negative bacteria [16,23,24]. The variation of intracellular drug accumulation was evaluated in the absence and in the presence of this membrane energy uncoupler.

Different strains representative of the two series were assayed in addition to the susceptible ATCC strain. By comparison to the ATCC strain, a 65% reduction in the chloramphenicol accumulation was detected in all tested chloramphenicol resistant *E. aerogenes* strains (Figure 2). This accumulation was significantly increased in the presence of CCCP during the incubation: 3.5 to 5 fold increase of intracellular chloramphenicol was obtained in the presence of the uncoupler (Figure 2). These results indicate that an active efflux pump is involved in chloramphenicol resistance in these isolates causing a decrease of intracellular drug concentration (Table 5).

**Detection of an immunorelated-AcrA component of the efflux pump**

To analyse the correlation between multidrug resistance and the presence of an efflux system we investigated the production of an

**Table 1.** Susceptibilities of the *E. aerogenes* isolates (1995) to different antibiotics (MIC µg/mL)<sup>a</sup>.

| Strain | IMI  | CEF | TET  | CHL  | NAL  | NFL   | OFL | SPA   |
|--------|------|-----|------|------|------|-------|-----|-------|
| 0      | 1    | 4   | 1    | 256  | >512 | 128   | 128 | 64    |
| 1      | 4    | 1   | 4    | 256  | >512 | 256   | 64  | 4     |
| 5      | 2    | 4   | 1    | 8    | >512 | 64    | 32  | 8     |
| 7      | 0,05 | 8   | 16   | 8    | 2    | 0,5   | <4  | 0,06  |
| 11     | 1    | 8   | 4    | 256  | >512 | 128   | 128 | 128   |
| 12     | 1    | 4   | 1    | 8    | 64   | 0,125 | <4  | 0,5   |
| 16     | 4    | 128 | 2    | 128  | 32   | 16    | <4  | <0,5  |
| 17     | 2    | 4   | 16   | >256 | >512 | 128   | 32  | 32    |
| 19     | >4   | 16  | 8    | 256  | >512 | 512   | 128 | 256   |
| 20     | 4    | 1   | 2    | 128  | >512 | 256   | 128 | 64    |
| 31     | 1    | 16  | 2    | 256  | >512 | 128   | 64  | 128   |
| 34     | >4   | 128 | 8    | 256  | >512 | 512   | 128 | 128   |
| 36     | 2    | 4   | >256 | 16   | >512 | 512   | 256 | 128   |
| 44     | 4    | 4   | 16   | >256 | >512 | 256   | 128 | 256   |
| 49     | >4   | 8   | 8    | >256 | >512 | 512   | 128 | 256   |
| 52     | >4   | 1   | 2    | 64   | >512 | 256   | 64  | 16    |
| 53     | >4   | 1   | 8    | >256 | >512 | 256   | 128 | 256   |
| 54     | 2    | 64  | 2    | 16   | >512 | 64    | 64  | 16    |
| 56     | >4   | 16  | <0,5 | 256  | >512 | 256   | 128 | 128   |
| 59     | 2    | 1   | 4    | <4   | <4   | <4    | <4  | <0,5  |
| 70     | >4   | 8   | 4    | >256 | 512  | 256   | 128 | 256   |
| 71     | 2    | 4   | 2    | <4   | >512 | <4    | <4  | 8     |
| 76     | 2    | 8   | 1    | 16   | >512 | 64    | 64  | 16    |
| 98     | 1    | 32  | >512 | 8    | 128  | 1     | <4  | 0,5   |
| 104    | 2    | 32  | 128  | 256  | >512 | 64    | 64  | 32    |
| 108    | 2    | 1   | 2    | <4   | >512 | 64    | 32  | 8     |
| 109    | 4    | 4   | 16   | >256 | >512 | 512   | 128 | 512   |
| 115    | 0,5  | 1   | 2    | 2    | >512 | 128   | 16  | 64    |
| 120    | 1    | 1   | 1    | 256  | >512 | 128   | 16  | 64    |
| 124    | 4    | 1   | 2    | 2    | 4    | 0,25  | <4  | 0,125 |
| 130    | 4    | 1   | 8    | >256 | >512 | 128   | 128 | 256   |
| 135    | 1    | 1   | 1    | 2    | 4    | 0,25  | <4  | <0,03 |
| 138    | 4    | 2   | 4    | 4    | 4    | <4    | <4  | <0,5  |
| 139    | 2    | 32  | 1    | 256  | >512 | 64    | 128 | 64    |
| 148    | 1    | 1   | 2    | <4   | 64   | 8     | <4  | <0,5  |
| 151    | 1    | 4   | 4    | 4    | 8    | 4     | <4  | 0,06  |
| 179    | 0,5  | 4   | 2    | 256  | >512 | 128   | 64  | 128   |
| 183    | 4    | 128 | 4    | >256 | >512 | 256   | 64  | 256   |
| 313    | 2    | 1   | 2    | 128  | >512 | 128   | 64  | 128   |
| 317    | >4   | 1   | 64   | 32   | >512 | 32    | 32  | 16    |
| 441    | 4    | 4   | 8    | >256 | >512 | 256   | 128 | 256   |
| 701    | >4   | 64  | 8    | >256 | >512 | 512   | 128 | 256   |
| 6582   | 4    | 4   | 4    | 256  | >512 | 256   | 128 | 256   |
| 7237   | 4    | 32  | 4    | 256  | >512 | 256   | 128 | 256   |
| 106701 | 2    | 1   | 8    | >256 | >512 | 256   | 128 | 512   |

<sup>a</sup>The values are the means of three independent assays. Antimicrobial agent abbreviations: IMI, Imipenem; CEF, Cefepime; TET, Tetracycline; CHL, Chloramphenicol; NAL, Nalidixic acid; NFL, Norfloxacin; OFL, Ofloxacin; SPA, Sparfloracin. doi:10.1371/journal.pone.0003203.t001

**Table 2.** Susceptibilities of the *E. aerogenes* isolates (2003) to different antibiotics (MIC µg/mL)<sup>a</sup>.

| Strain | IMI | CEF | TET | CHL  | NAL  | NFL  | OFL | SPA  |
|--------|-----|-----|-----|------|------|------|-----|------|
| 100128 | 1   | 2   | 1   | 8    | >512 | 64   | 128 | 64   |
| 101234 | 2   | 1   | 4   | >256 | >512 | 128  | 64  | 64   |
| 101451 | 1   | 1   | 2   | 4    | 8    | 0,25 | <4  | 0,06 |
| 101979 | 4   | 2   | 4   | 16   | >512 | 128  | 128 | 256  |
| 103280 | 4   | 1   | 8   | 8    | 16   | <4   | <4  | <0,5 |
| 105784 | 4   | 4   | 4   | 32   | >512 | 256  | 128 | 256  |
| 105891 | 2   | 1   | 0,5 | 8    | 4    | 0,25 | <4  | 0,06 |
| 106206 | 4   | 64  | 4   | 256  | >512 | 128  | 128 | 256  |
| 107868 | 2   | 8   | 0,5 | 128  | >512 | 128  | 128 | 128  |
| 108055 | 4   | 1   | 16  | 16   | 512  | 8    | <4  | <0,5 |
| 108418 | 1   | 2   | 8   | >256 | >512 | 256  | 128 | 256  |
| 108969 | 4   | 1   | 4   | 16   | 16   | <4   | <4  | <0,5 |
| 109688 | 1   | 4   | 2   | 16   | >512 | 128  | 64  | 64   |
| 109709 | 4   | 2   | 4   | 16   | >512 | 512  | 128 | 256  |
| 110199 | 2   | 1   | 0,5 | 4    | 8    | 0,25 | <4  | 0,06 |
| 110360 | 2   | 1   | 32  | >256 | >512 | 256  | 128 | 256  |
| 110721 | 4   | 1   | 4   | 16   | >512 | 512  | 256 | 512  |
| 111631 | 2   | 1   | 16  | >256 | >512 | 256  | 128 | 256  |
| 112144 | 4   | 1   | 4   | 16   | 16   | <4   | <4  | <0,5 |
| 112446 | 4   | 1   | 32  | 32   | 128  | <4   | <4  | <0,5 |
| 112978 | 4   | 4   | 2   | <4   | >512 | 256  | 64  | 128  |
| 113022 | 2   | 4   | 2   | 256  | >512 | 256  | 128 | 64   |
| 115264 | 4   | 4   | 8   | >256 | >512 | 256  | 128 | 256  |
| 118259 | 1   | 2   | 4   | 256  | >512 | 256  | 128 | 256  |
| 121435 | 2   | 8   | 8   | >256 | >512 | 512  | 128 | 256  |
| 121652 | 1   | 1   | 2   | 0,5  | 8    | 0,25 | <4  | 4    |
| 121653 | 1   | 1   | 2   | 256  | >512 | 256  | 256 | 128  |
| 121681 | 2   | 4   | 4   | 256  | >512 | 512  | 128 | 256  |
| 122554 | 0,5 | 4   | 2   | 128  | >512 | 64   | 64  | 64   |
| 122791 | 2   | 4   | 2   | 64   | >512 | 256  | 256 | 128  |
| 123258 | 4   | 1   | 8   | 16   | 16   | <4   | <4  | <0,5 |
| 123369 | 4   | 1   | 8   | 256  | >512 | 256  | 128 | 256  |
| 123800 | 2   | 1   | 4   | 4    | 8    | <4   | <4  | <0,5 |
| 128500 | 1   | 2   | 4   | 256  | >512 | 128  | 128 | 128  |
| 128553 | >4  | 8   | 8   | >256 | >512 | 128  | 128 | 256  |
| 129689 | 4   | 4   | 8   | >256 | >512 | 256  | 64  | 256  |
| 131102 | 4   | 2   | 8   | >256 | >512 | 256  | 128 | 256  |
| 131150 | 0,5 | 2   | 4   | 256  | >512 | 128  | 128 | 128  |
| 131538 | >4  | 32  | 8   | >256 | >512 | 256  | 128 | 256  |
| 134146 | 2   | 1   | 4   | 32   | >512 | 128  | 64  | 32   |
| 134147 | 2   | 1   | 16  | 64   | >512 | 256  | 128 | 64   |
| 136160 | 1   | 2   | 2   | 16   | >512 | 256  | 128 | 256  |
| 137454 | 4   | 1   | 2   | 4    | >512 | 32   | 32  | 16   |
| 137464 | >4  | 64  | 8   | >256 | >512 | 512  | 128 | 256  |
| 138074 | 1   | 1   | 1   | 16   | >512 | 128  | 128 | 64   |
| 138215 | 1   | 8   | 1   | 64   | >512 | 128  | 128 | 128  |
| 181131 | 2   | 8   | 4   | 256  | >512 | 256  | 64  | 32   |
| 181243 | 4   | 1   | 4   | <4   | 16   | <4   | <4  | <0,5 |

<sup>a</sup>The values are the means of three independent assays. Antimicrobial agent abbreviations: IMI, Imipenem; CEF, Cefepime; TET, Tetracycline; CHL, Chloramphenicol; NAL, Nalidixic acid; NFL, Norfloxacin; OFL, Ofloxacin; SPA, Sparfloxacin. doi:10.1371/journal.pone.0003203.t002

**Table 3.** Percentages of *Enterobacter aerogenes* resistant strains.

| Year        | Number of strains | Number of resistant strains |     |      |      |      |      |      |      |
|-------------|-------------------|-----------------------------|-----|------|------|------|------|------|------|
|             |                   | IMI                         | CEF | TET  | CHL  | NAL  | NFL  | OFL  | SPA  |
| MIC (µg/ml) |                   | >8                          | >32 | >8   | >16  | >16  | >1   | >1   | >2   |
| 1995        | 45                | 2                           | 6   | 8    | 29   | 39   | 37   | 34   | 36   |
| 2003        | 48                | 0                           | 2   | 5    | 28   | 38   | 37   | 35   | 37   |
| Total       | 93                | 2                           | 8   | 13   | 57   | 77   | 74   | 69   | 72   |
| %           |                   | 2.1                         | 8.6 | 13.9 | 61.3 | 82.7 | 79.5 | 74.1 | 78.4 |

Antimicrobial agent abbreviations: IMI, Imipenem; CEF, Cefepime; TET, Tetracycline; CHL, Chloramphenicol; NAL, Nalidixic Acid; NFL, Norfloxacin; OFL, Ofloxacin; SPA, Sparfloxacin. doi:10.1371/journal.pone.0003203.t003

immunorelated-AcrA component in the isolates exhibiting an energy dependent efflux of chloramphenicol [29,30]. Regarding the expression of membrane transporters, we have recently demonstrated that a positive signal obtained from RT-PCR is not conclusive to conclude for the correct and functional production of a bacterial membrane protein [31]. It is important to mention that for membrane proteins (such as efflux transporters), several post-translational steps down-regulate their production in addition to the transcriptional regulation of their genes [31,32]. There are the reasons for which the production of an active efflux immunorelated to the AcrAB-TolC system was checked by western blot analysis using an anti-AcrA polyclonal antibody as previously described [33]. We observed the presence of an immunorelated-AcrA protein in a large number of resistant *E. aerogenes* clinical isolates compared to *E. aerogenes* EAEP294 which contains an *acrA* gene knock-out insertion. Interestingly, the isolate 54 presented no immunorelated-AcrA signal. Concerning EAEP294, it has been previously reported that this strain contains another efflux pump involved in antibiotic resistance and the anti-AcrA antibody is able to recognize an immunorelated-AcrA protein [33,34]. Moreover, several clinical strains exhibited a high level of AcrA-like protein production similar to that observed in strain EAEP289, which has previously been shown to have an increased AcrA expression [21] and a high efflux pump activity (data not shown).

**Discussion**

Emergence and evolution of drug resistance mechanisms in bacteria is an unavoidable phenomenon because it represents a natural adaptative response to environmental stress. Among the resistance mechanisms, high expression of drug efflux pumps is an

**Table 4.** Effect of EPI on chloramphenicol susceptibility of *E. aerogenes* strains.

| Year      | Number of strains | EP <sup>b</sup> susceptible |     | EP insusceptible I+R |
|-----------|-------------------|-----------------------------|-----|----------------------|
|           |                   | I+R <sup>a</sup>            | I+R |                      |
| 1995+2003 | 93                | 70                          | 29  | 41                   |
| 1995      | 45                | 32                          | 9   | 23                   |
| 2003      | 48                | 38                          | 20  | 18                   |

I, R<sup>a</sup>: Intermediate, Resistant. EP<sup>b</sup>: Efflux Pump susceptible when PAβN induces a decrease of at least 3 dilutions. doi:10.1371/journal.pone.0003203.t004

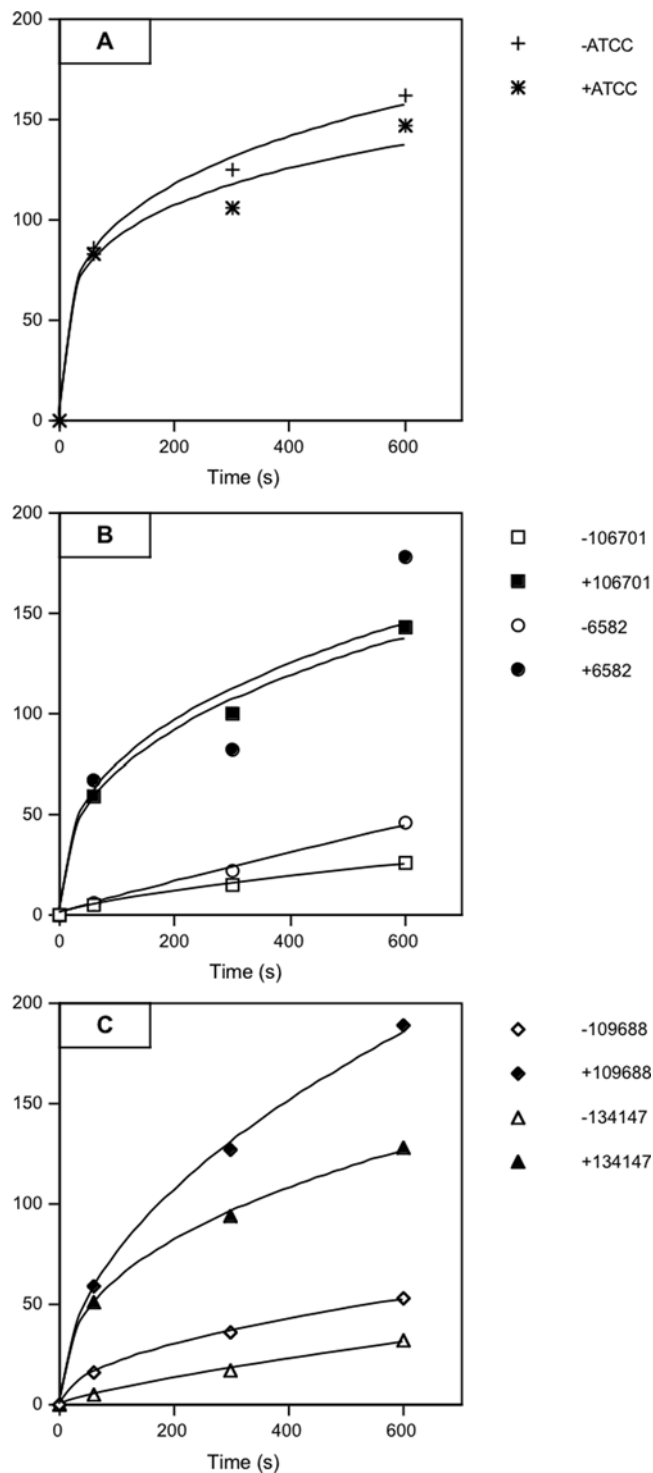

**Figure 2. Uptake of <sup>14</sup>C chloramphenicol by *E. aerogenes* strains.** Accumulation of [<sup>14</sup>C] chloramphenicol was measured in ATCC type strain (A) and in clinical strains isolated during the years 1995 (B) and 2003 (C). ATCC13048 in the absence (+) and in the presence (\*) of CCCP; strain 106701 in the absence (□) and in the presence (■) of CCCP; strain 6582 in the absence (○) and in the presence (●) of CCCP; strain 109688 in the absence (◇) and in the presence (◆) of CCCP; strain 134147 in the absence (△) and in the presence (▲) CCCP. Each point is the mean of three independent experiments. Values were plotted as cpm/OD<sub>600</sub> over time (s). doi:10.1371/journal.pone.0003203.g002

underestimated mechanism which is contributing to resistance in clinical Gram-negative bacteria isolates of many pathogens such as *Pseudomonas aeruginosa* [35,36], *Klebsiella pneumoniae* [29,37] or *E. aerogenes* [13,21].

The prevalence of an identified active efflux system in highly resistant clinical *E. aerogenes* strains collected, during 1995 and 2003, in a same area has been investigated. In a preliminary screen, the two collections exhibited a similar resistance profile for tetracycline, chloramphenicol, and the quinolones tested. In addition, molecular epidemiological typing indicates a relatively close relationship between the analyzed isolates and the previously major prevalent clone identified in different hospital infections due to *E. aerogenes* [4,9,11]. These results provide evidence for a stability in the resistance phenotype between 1995–2003 in the isolation site.

As previously reported, a broad spectrum efflux pump inhibitor, such as PABN, may be used to discriminate between the resistance mechanisms involved in resistant isolates and to characterize the role of inhibitor-susceptible efflux pumps [22,24,38]. It has been demonstrated that PABN may increase the activity of antibiotics which are expelled by efflux pumps such as AcrAB-TolC or MexAB-OprM [13,22,29,38,39]. This compound has been shown to restore the antibiotic intracellular concentration in several Gram-negative bacteria species including *E. aerogenes* [24,30]. In all cases, the level of restoration of antibiotic susceptibility depends on the presence of additional resistance mechanisms such as target mutations or enzymatic barriers [30,37,39–41].

An active and PABN-susceptible drug efflux system was evidenced in multiresistant *E. aerogenes* isolates. The activity of chloramphenicol efflux was determined in the presence and absence of PABN, and the MICs were significantly decreased in the presence of PABN in 40% of chloramphenicol resistant strains. In susceptible strains (MIC < 8 µg/mL), the MICs were not noticeably affected by PABN. These results indicate the presence of an efflux resistance mechanism that is reversed by PABN addition in some chloramphenicol resistant strains. In these strains, the intracellular chloramphenicol concentration was influenced by CCCP, as the addition of this uncoupler of the proton motive force induced a substantial increase (3–5 fold) in the level of accumulated chloramphenicol. Moreover, in some isolates, a production of an immunorelated-AcrA efflux component was detected suggesting the involvement of a AcrAB-like efflux pump.

It is interesting to note that from the twenty nine strains that exhibit this PABN-reversed efflux, twenty were isolated in 2003 and only nine were isolated in 1995. This variation indicated that the number of strains able to expel chloramphenicol had noticeably increased during this eight year interval. This is a major point taking into account that chloramphenicol is rarely used in clinical settings and the relative conservation of a resistant phenotype in the two tested collections. This result suggests that during this eight year period, the clinical environment, such as use of antimicrobial products and the consequent pressure on bacterial flora or colonizing bacteria, has selected strains expressing poly-selective efflux pumps since the FloR pump exhibits a specific activity for structurally-related phenolic drugs [42]. Several chemicals, e.g. biocides, bile salts or other efflux substrates are efficient agents for selecting bacteria that overexpress efflux pump mechanism [43–46]. This type of resistance survey is more restricted that global studies carried out in ESAC group [47,48] or in the EARSS group [49] but yields interesting acute data concerning the evolution of one bacterial species and one resistance mechanism in a given hospital area. This selection allows us to a better approach of the antibiotic resistance evolution during the selected period. Regarding the resistance survey, it is important to mention that the COST Action BM0701(see http://

**Table 5.** Antimicrobial susceptibilities and chloramphenicol accumulation in *E. aerogenes* strains.

| Strains (year)          | MIC ( $\mu\text{g/mL}$ ) |             |          |          |            |            |        |      |      | Ratio of CHL accumulation <sup>a</sup> |
|-------------------------|--------------------------|-------------|----------|----------|------------|------------|--------|------|------|----------------------------------------|
|                         | OFL                      | NFL         | CIP      | SPA      | NAL        | CHL        | TET    | CEF  | IMI  |                                        |
| EA6582 (1995)           | 128 (32)                 | 256 (256)   | 128 (64) | 256 (32) | >512 (512) | 256 (64)   | 4      | 4    | 4    | 3.9                                    |
| EA106701 (1995)         | 128 (32)                 | 256 (256)   | 64 (64)  | 512 (32) | >512 (256) | >256 (64)  | 8      | 2    | 2    | 5.0                                    |
| EA109688 (2003)         | 64 (32)                  | 128 (128)   | 64 (32)  | 64 (4)   | >512 (256) | 16 (1)     | 2      | 4    | 1    | 3.5                                    |
| EA134147 (2003)         | 128 (16)                 | 256 (256)   | 64 (32)  | 64 (4)   | >512 (512) | 64 (<4)    | 16     | 1    | 2    | 4.0                                    |
| ATCC 15038 <sup>b</sup> | N.D. <sup>c</sup>        | 0.12 (0.12) | N.D.     | 0.06     | N.D.       | 2 (1)      | 0.5    | 0.25 | 0.25 | 1.1                                    |
| EAEP294 <sup>b</sup>    | N.D.                     | 64          | 16       | N.D.     | 1024 (128) | 32 (32)    | <0.25  | N.D. | N.D. | N.D.                                   |
| EAEP289 <sup>b</sup>    | N.D.                     | 256         | 32       | N.D.     | 1024 (256) | 1024 (128) | 8      | N.D. | N.D. | N.D.                                   |
| EA27 <sup>b</sup>       | >128                     | 256 (128)   | 32       | >64      | >128       | 512 (64)   | 16 (2) | N.D. | N.D. | 3.0                                    |

<sup>a</sup>Ratio of chloramphenicol accumulated at 600 s with and without CCCP.

<sup>b</sup>*E. aerogenes* control strains used: ATCC 15038 reference strain that expresses a normal level of the AcrAB efflux system; EAEP294 (*acrA*<sup>-</sup> deleted mutant) and EAEP289 that exhibits overexpression of the AcrAB efflux system.

<sup>c</sup>N.D.: not determined.

Antimicrobial agent abbreviations: IMI, Imipenem; CEF, Cefepime; TET, Tetracycline; CHL, Chloramphenicol; NAL, Nalidixic Acid; NFL, Norfloxacin; OFL, Ofloxacin; SPA, Sparfloxacin; CIP, Ciprofloxacin. Values in parentheses were determined in the presence of efflux pump inhibitor PA $\beta$ N at 26.3  $\mu\text{g/ml}$ .

doi:10.1371/journal.pone.0003203.t005

www.cost.esf.org/bmbs) starting this year, is focused to the study of drug efflux mechanisms from clinical to chemical aspects.

After the emergence of extended spectrum  $\beta$ -lactamases in *E. aerogenes* isolates and the recent characterisation of porin mutations in clinical isolates [2,6,11,15,50], this study describing an increase in inhibitor-susceptible efflux throws light on a new step in the evolution of mechanism in *E. aerogenes*. With the recent description of the key role of efflux pumps in favouring the acquisition of other resistance mechanisms in Gram-negative bacteria such as target mutation [25,26], and in bacterial pathogenesis and fitness [51,52], the increase of the number of clinical strains overproducing efflux pumps represents a serious emerging risk for the treatment of these infections.

## Methods

### Bacterial strains and growth media

A total of 93 strains of *Enterobacter aerogenes* were isolated in 1995 and 2003 in the hospitals of Marseille (France) from a variety of clinical specimens (respiratory tract, secretions, blood, urinary tract, etc ...). They were selected according to their noticeable resistance against several  $\beta$ -lactam antibiotics [10]. The *Enterobacter aerogenes* ATCC 15038 type strain was used as the reference (susceptible) strain for uptake of chloramphenicol. For immunodetection and characterization of efflux pumps, the strains EA ATCC 15038, EAEP289 (derivative of the clinical strain EA27) exhibiting norfloxacin efflux and the mutant EAEP294, which does not express AcrA were used [16,21]. Bacteria were routinely grown in Luria Bertani (LB) or Mueller-Hinton (MH) broth at 37°C. The strain EA EP294 was grown in the presence of 50  $\mu\text{g/ml}$  kanamycin.

### Antibiotic susceptibility tests

Susceptibility to imipenem, cefepime, nalidixic acid, norfloxacin, ofloxacin, ciprofloxacin, sparfloxacin, chloramphenicol and tetracycline was determined by the broth dilution method, as previously described [16] and according to the Clinical and Laboratory Standards Institute (<http://www.clsi.org>) and Comite de l'Antibiogramme de la SFM (<http://www.sfm.asso.fr/nouv/general.php?pa=2>). For the determination of MICs, approxi-

mately  $10^6$  cells were inoculated into 1 ml MH broth containing twofold serial dilutions of each antibiotic. Results were read after 18 h at 37°C. The efflux pump inhibitor (EPI) phenylalanine-arginine  $\beta$ -naphthylamide, PA $\beta$ N [22], was used as previously described [24]. In this study, a fixed concentration of 26.3  $\mu\text{g/ml}$  of EPI was selected for testing clinical isolates.

The MIC was the lowest concentration of the antimicrobial agent at which no growth was detected and resistance was defined as previously described [10,13]. For chloramphenicol MIC $\leq$ 8 corresponds to susceptible phenotype, 8<MIC<16 to an intermediate phenotype, and 16<MIC corresponds to resistant phenotype according to French Committee (<http://www.sfm.asso.fr/nouv/general.php?pa=2>). It is important to mention that, today no chloramphenicol breakpoint is proposed for *E. aerogenes* and *Enterobacter* spp by specific committee (European Antimicrobial Resistance Surveillance System, <http://www.rivm.nl/earss/>; European Committee on Antimicrobial Susceptibility Testing, [http://www.srga.org/eucastwt/WT\\_EUCAST.htm](http://www.srga.org/eucastwt/WT_EUCAST.htm)). An efflux pump activity was identified when the PA $\beta$ N addition induced a three fold decrease in MIC value for an antibiotic molecule [24,29].

### Epidemiological typing

*E. aerogenes* typing was carried out by pulsed field gel electrophoresis (PFGE) with a CHEF-Mapper system (Bio-Rad France) as previously described [53]. Briefly, the *E. aerogenes* chromosomal DNA was digested with the restriction enzyme *Xba* I. Electrophoresis was performed for 22 hours with a pulsed time ranging from 1 to 50 s. Forty four clinical isolates from these two collections along with two clinical strains previously isolated, EA27 and EA3 [15], and the two EA ATCC strains 13048 and 15038 were studied for PFGE profile comparison.

### Measurement of chloramphenicol accumulation

Measurement of <sup>14</sup>C chloramphenicol accumulation by intact cells has been described previously [13,24]. Exponential-phase bacteria grown in LB broth were pelleted, washed once, and resuspended to a density of  $10^{10}$  CFU/ml in 50 mM sodium phosphate buffer, pH7, containing 5 mM magnesium chloride. To de-energize the bacteria and block the efflux process, 50  $\mu\text{M}$  carbonyl cyanide *m*-chlorophenylhydrazone (CCCP) was added



10 minutes before the radio-labelled chloramphenicol. Samples removed at set intervals were filtered and washed. The filters were dried and radioactivity was measured in a Packard scintillation counter.

### SDS-PAGE and immunodetection of AcrA

Exponential-phase bacteria in LB broth were pelleted and solubilized in boiling buffer at 96°C as described elsewhere [10,13,16]. Samples (amount corresponding to 0.02 optical density units at 600 nm) were loaded onto SDS-polyacrylamide gels (10% polyacrylamide, 0.1% SDS), then electrotransferred to nitrocellulose membranes [16]. Membranes were probed with antibodies raised against AcrA [33] (1:50,000 dilution). Immunoreactive

proteins were visualized with alkaline phosphatase -conjugated anti-rabbit secondary antibodies [13,16].

### Acknowledgments

This study is submitted in memoriam to Claude Bollet deceased during this work. We thank L. Amaral, J.M. Bolla and C. James for fruitful discussion.

### Author Contributions

Conceived and designed the experiments: JC JMP. Performed the experiments: JC CM EG PN. Analyzed the data: JC CM EG PN ADR JMP. Contributed reagents/materials/analysis tools: PN ADR. Wrote the paper: JC JMP.

### References

- Davin-Réglé A, Pagès J-M (2006) Regulation of efflux pumps in Enterobacteriaceae: genetic and chemical effectors. Multiple drug resistance bacteria. 2<sup>nd</sup> edition, Carlos F. Amabile-Cuevas Editor.
- Arpin C, Coze C, Rogues AM, Gachie JP, Bebear C, et al. (1996) Epidemiological study of an outbreak due to multidrug-resistant *Enterobacter aerogenes* in a medical intensive care unit. *J Clin Microbiol* 34: 2163–2169.
- Davin-Réglé A, Monnet D, Saux P, Bosi C, Charrel R, et al. (1996) Molecular epidemiology of *Enterobacter aerogenes* acquisition: one year prospective study in two intensive care units. *J Clin Microbiol* 34: 1474–1480.
- Bornet C, Davin-Réglé A, Bosi C, Pagès J-M, Bollet C (2000) Imipenem resistance of *Enterobacter aerogenes* mediated by outer membrane permeability. *J Clin Microbiol* 38: 1048–1052.
- De Gheldre Y, Struelens MJ, Glupczynski Y, De Mol P, Maes N, et al. (2001) National epidemiologic surveys of *Enterobacter aerogenes* in Belgian hospitals from 1996 to 1998. *J Clin Microbiol* 39: 889–896.
- Canton R, Oliver A, Coque TM, VarelaMdel C, Perez-Diaz JC, et al. (2002) Epidemiology of extended-spectrum beta-lactamase-producing *Enterobacter* isolates in a Spanish hospital during a 12-year period. *J Clin Microbiol* 40: 1237–1243.
- Vonberg RP, Wolter A, Kola A, Ziesing S, Gastmeier P (2007) The endemic situation of *Enterobacter aerogenes* and *Enterobacter cloacae*: you will only discover what you are looking for. *J Hosp Infect* 65: 372–374.
- Wenzel RP, Sahn DF, Thornsberry C, Draghi DC, Jones ME, Karlowsky JA (2003) *In vitro* susceptibilities of gram-negative bacteria isolated from hospitalized patients in four European countries, Canada, and the United States in 2000–2001 to expanded-spectrum cephalosporins and comparator antimicrobials: implications for therapy. *Antimicrob Agents Chemother* 47: 3089–3098.
- Bosi C, Davin-Réglé A, Bornet C, Malléa M, Pagès J-M, et al. (1999) Most *Enterobacter aerogenes* strains in France belong to a prevalent clone. *J Clin Microbiol* 37: 2165–2169.
- Charrel RN, Pagès J-M, De Micco P, Malléa M (1996) Prevalence of outer membrane porin alteration in beta-lactam-antibiotic-resistant *Enterobacter aerogenes*. *Antimicrob Agents Chemother* 40: 2854–2858.
- Thiolas A, Bornet C, Davin-Réglé A, Pagès J-M, Bollet C (2004) Resistance to imipenem, cefepime, and ceftipime associated with mutation in Omp36 osmoporin of *Enterobacter aerogenes*. *Biochem Biophys Res Commun* 317: 851–856.
- Thiolas A, Bollet C, La Scola B, Raoult D, Pagès J-M (2005) Successive emergence of *Enterobacter aerogenes* strains resistant to imipenem and colistin in a patient. *Antimicrob Agents Chemother* 49: 354–358.
- Gayet S, Chollet R, Molle G, Pagès J-M, Chevalier J (2003) Modification of outer membrane protein profile and evidence suggesting an active drug pump in *Enterobacter aerogenes* clinical strains. *Antimicrob Agents Chemother* 47: 1555–1559.
- Goshi S, Taneike I, Nagawa S, Kojio S, Tamura Y, et al. (2002) DNA analysis of nosocomial infection by *Enterobacter aerogenes* in three cases of septicemia in Japan. *J Hops Infect* 51: 221–225.
- Arpin C, Dubois V, Coulange L (2003) Extended-spectrum-beta-lactamase-producing *Enterobacteriaceae* in community and private health care centers. *Antimicrob Agents Chemother* 47: 3506–3514.
- Malléa M, Chevalier J, Bornet C, Eyraud A, Davin-Réglé A, et al. (1998) Porin alteration and active efflux: two *in vivo* drug resistance strategies used by *Enterobacter aerogenes*. *Microbiology* 144: 3003–3009.
- Bornet C, Chollet R, Malléa M, Chevalier J, Davin-Réglé A, et al. (2003) Imipenem and expression of multidrug efflux pump in *Enterobacter aerogenes*. *Biochem Biophys Res Commun* 301: 985–990.
- Poole K (2005) Efflux-mediated antimicrobial resistance. *J Antimicrob Chemother* 56: 20–51.
- Elkins CA, Nikaido H (2003) 3D structure of AcrB: the archetypal multidrug efflux transporter of *Escherichia coli* likely captures substrates from periplasm. *Drug Resist Updat* 6: 9–13.
- Piddock IJ (2006) Clinically relevant chromosomally encoded multidrug resistance efflux pumps in bacteria. *Clin Microbiol Rev* 19: 382–402.
- Pradel E, Pagès J-M (2002) The AcrAB-TolC pump contributes to multidrug resistance in the nosocomial pathogen *Enterobacter aerogenes*. *Antimicrob Agents Chemother* 46: 2640–2643.
- Lomovskaya O, Warren MS, Lee A, Galazzo J, Fronko R, et al. (2001) Identification and characterization of inhibitors of multidrug resistance efflux pumps in *Pseudomonas aeruginosa*: novel agents for combination therapy. *Antimicrob Agents Chemother* 45: 105–116.
- Pagès J-M, Masi M, Barbe J (2005) Inhibitors of efflux pumps in Gram-negative bacteria. *Trends Mol Med* 11: 382–389.
- Malléa M, Chevalier J, Eyraud A, Pagès J-M (2002) Inhibitors of antibiotics efflux pumps in resistant *Enterobacter aerogenes* strains. *Biochem Biophys Res Commun* 293: 1370–1373.
- Ricci V, Tzakas P, Buckley A, Piddock L J (2006) Ciprofloxacin-resistant *Salmonella enterica* serovar Typhimurium strains are difficult to select in the absence of AcrB and TolC. *Antimicrob Agents Chemother* 50: 38–42.
- Yan M, Sahin O, Lin J, Zhang Q (2006) Role of the CmeABC efflux pump in the emergence of fluoroquinolone-resistant *Campylobacter* under selection pressure. *J Antimicrob Chemother* 58: 1154–1159.
- Tenover FC, Arbeit RD, Goering RV, Mickelsen PA, Murray BE, et al. (1995) Interpreting chromosomal DNA restriction patterns produced by pulsed field gel electrophoresis: criteria for bacterial strain typing. *J Clin Microbiol* 33: 2233–2239.
- Dumarche P, De Champs C, Sirot D, Chanal C, Bonnet R, et al. (2002) TEM derivative-producing *Enterobacter aerogenes* strains: dissemination of a prevalent clone. *Antimicrob Agents Chemother* 46: 1128–1131.
- Hasdemir UO, Chevalier J, Nordmann P, Pagès J-M (2004) Detection and prevalence of active drug efflux mechanism in various multidrug-resistant *Klebsiella pneumoniae* strains from Turkey. *J Clin Microbiol* 42: 2701–2706.
- Ghisalberti D, Masi M, Pagès J-M, Chevalier J (2005) Chloramphenicol and expression of multidrug efflux pump in *Enterobacter aerogenes*. *Biochem Biophys Res Commun* 328: 1113–1118.
- Viveiros M, Dupont M, Rodrigues L, Couto I, Davin-Réglé A, Martins M, Pagès J-M, Amaral L (2007) Antibiotic stress, genetic response and altered permeability of *E. coli*. *PLoS ONE* Apr 11;2(4): e365.
- Ruiz N, Kahne D, Silhavy TJ (2006) Advances in understanding bacterial outer membrane biogenesis. *Nat Rev Microbiol* 4: 57–66.
- Masi M, Pagès J-M, Pradel E (2006) Production of the cryptic EefABC efflux pump in *Enterobacter aerogenes* chloramphenicol-resistant mutants. *J Antimicrob Chemother* 57: 1223–1226.
- Chollet R, Chevalier J, Bryskier A, Pagès J-M (2004) The AcrAB-TolC pump is involved in macrolide resistance but not in telithromycin efflux in *Enterobacter aerogenes* and *Escherichia coli*. *Antimicrob Agents Chemother* 48: 3621–3624.
- George AM (1996) Multidrug resistance in enteric and other gram-negative bacteria. *FEMS Microbiol Letters* 139: 1–10.
- Aeschlimann JR (2003) The role of multidrug efflux pumps in the antibiotic resistance of *Pseudomonas aeruginosa* and other gram-negative bacteria. Insights from the Society of Infectious Diseases Pharmacists. *Pharmacotherapy* 23: 916–924.
- Mazzariol A, Zuliani J, Cornaglia G, Rossolini GM, Fontana R (2002) AcrAB efflux systems: expression and contribution to fluoroquinolone resistance in *Klebsiella* spp. *Antimicrob Agents Chemother* 12: 3984–3986.
- Lomovskaya O, Bostian KA (2006) Practical applications and feasibility of efflux pump inhibitors in the clinic—a vision for applied use. *Biochem Pharmacol* 71: 910–918.
- Saenz Y, Ruiz J, Zараazaga M, Teixido M, Torres C, et al. (2004) Effect of the efflux pump inhibitor Phe-Arg-beta-naphthylamide on the MIC values of the quinolones, tetracycline and chloramphenicol, in *Escherichia coli* isolates of different origin. *J Antimicrob Chemother* 53: 544–545.
- Quale J, Bratu S, Gupta J, Landman D (2006) Interplay of efflux system, ampC, and oprD expression in carbapenem resistance of *Pseudomonas aeruginosa* clinical isolates. *Antimicrob Agents Chemother* 50: 1623–1641.
- Saito R, Sato K, Kutima W, Inami N, Nishiyama H, et al. (2006) Role of type II topoisomerase mutations and AcrAB efflux pump in fluoroquinolone-resistant clinical isolates of *Proteus mirabilis*. *J antimicrob Chemother* 58: 673–677.

42. Braibant M, Chevalier J, Chaslus-Dancla E, Pagès J-M, Cloeckaert A (2005) Structural and functional study of the phenicol-specific efflux pump FloR belonging to the Major Facilitator Superfamily. *Antimicrob Agents Chemother* 49: 2965–2971.
43. Bernstein C, Berstein H, Payne CM, Beard SE, Schneider J (1999) Bile salt activation of stress response promoters in *Escherichia coli*. *Curr Microbiol* 39: 68–72.
44. Russel AD (2003) Biocide use and antibiotic resistance: the relevance of laboratory findings to clinical and environmental situations. *Lancet Infect Dis* 3: 794–803.
45. Poole K (2008) Bacterial multidrug efflux pumps serve other functions. *Microbe* 3: 179–185.
46. Piddock LJ (2007) Multidrug-resistance efflux pumps - not just for resistance. *Nat Rev Microbiol* 4: 629–636.
47. Goosens H, Ferech M, Vander Stichele R, Elseviers M, for the ESAC Project Group (2005) Outpatient antibiotic use in Europe and association with resistance: a cross-national database study. *Lancet* 365: 579–587.
48. Ferech M, Coenen S, Malhotra-Kumar S, Dvorakova K, Hendrickx E, et al. (2006) European surveillance of antimicrobial consumption (ESAC): outpatient quinolone use in Europe. *J Antimicrobial Chemother* 58: 423–427.
49. EARSS Annual reports 2006. <http://www.rivm.nl/earss/result/>.
50. Machado E, Coque TM, Cantón R, Novais A, Sousa JC, Baquero F, Peixe L, Portuguese Resistance Study Group (2007) High diversity of extended-spectrum beta-lactamases among clinical isolates of Enterobacteriaceae from Portugal. *J Antimicrob Chemother* 60: 1370–1374.
51. Buckley AM, Webber MA, Cooles S, Randall LP, La Ragione RM, et al. (2006) The AcrAB-TolC efflux system of *Salmonella enterica* serovar Typhimurium plays a role in pathogenesis. *Cell Microbiol* 8: 847–856.
52. Warner DM, Folster JP, Shafer WM, Jerse AE (2008) Regulation of the MtrC-MtrD-MtrE efflux-pump system modulates the *in vivo* fitness of *Neisseria gonorrhoeae*. *J Infect Dis* 196: 1804–1812.
53. Lavigne JP, Bouzigues N, Chanal C, Mahamat A, Michaux-Charachon S, et al. (2004) Molecular epidemiology of *Enterobacteriaceae* isolates producing extended-spectrum  $\beta$ -lactamases in a French hospital. *J Clin Microbiol* 42: 3805–3808.
